# Supplementary material for: Multilevel Social Determinants of Patient-Reported Outcomes in Young Survivors of Childhood Cancer
Source: MDPI journal article supplement (doi:10.3390/cancers16091661), 2024-04-25
Supplement: s1 [file s1]

## Supplementary Tables and Figures

Supplementary Figure S1. Flow diagram of study participants enrolled in this study.

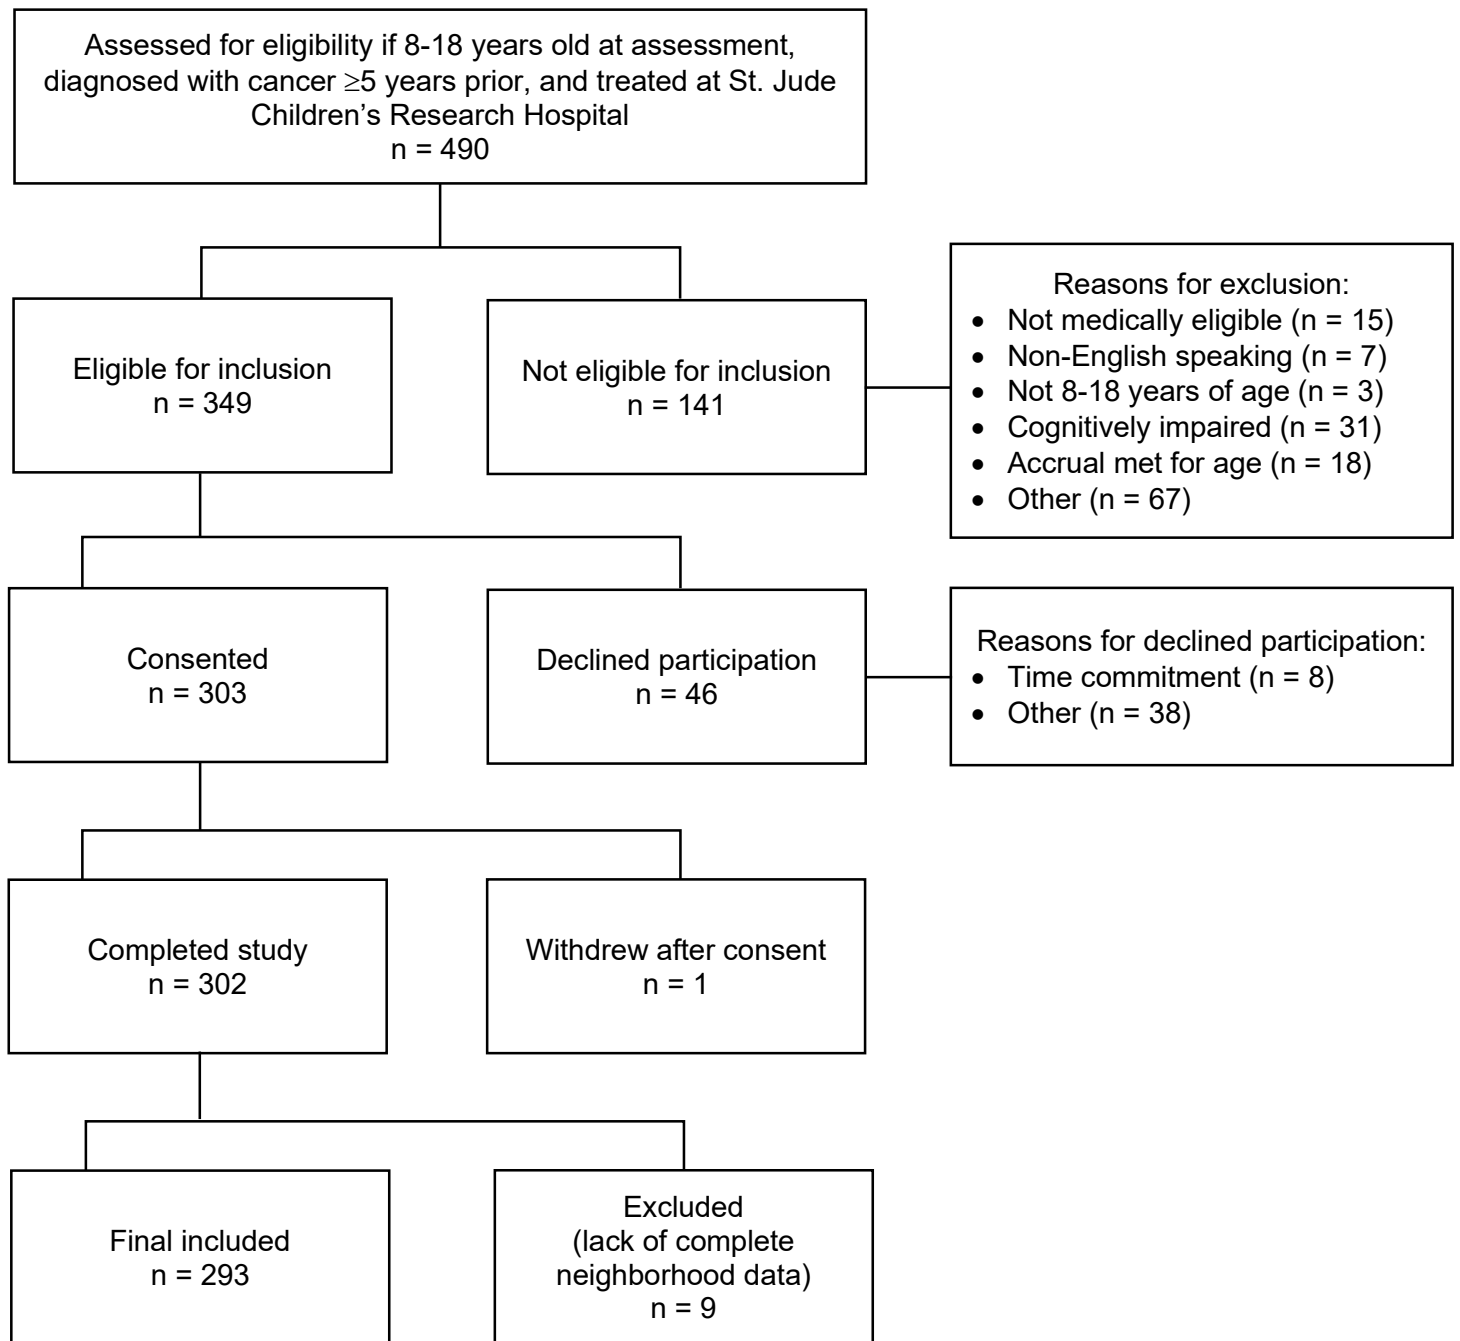

Supplementary Table S1. Deprivation status of all counties in the U.S. and the counties where survivors reside<sup>†,‡</sup>.

| Domains                              | All counties in the U.S. that were classified as deprivation (n=3,142) | Counties, where survivors resided, were classified as deprivation |
|--------------------------------------|------------------------------------------------------------------------|-------------------------------------------------------------------|
|                                      | n (%) <sup>§,#</sup>                                                   | n (%) <sup>§,#</sup>                                              |
| Socioeconomic status                 | 1,372 (48.0)                                                           | 160 (60.6)                                                        |
| Not completing high school           | 381 (12.3)                                                             | 65 (22.9)                                                         |
| Unemployment                         | 373 (11.7)                                                             | 16 (5.6)                                                          |
| Children in poverty                  | 480 (15.0)                                                             | 38 (13.4)                                                         |
| Children in single-parent households | 403 (12.6)                                                             | 75 (26.4)                                                         |
| Social associations deprivation      | 307 (9.6)                                                              | 32 (11.3)                                                         |
| Violent crime deprivation            | 415 (13.8)                                                             | 114 (43.2)                                                        |
| Injury deaths deprivation            | 399 (13.8)                                                             | 10 (3.5)                                                          |
| Physical environment                 | 750 (23.5)                                                             | 125 (44.0)                                                        |
| Severe housing problems              | 399 (12.5)                                                             | 50 (17.6)                                                         |
| Driving alone to work                | 175 (5.9)                                                              | 46 (16.2)                                                         |
| Long commute time                    | 528 (16.5)                                                             | 52 (18.3)                                                         |

<sup>†</sup> Data from the County Health Rankings & Roadmaps by the Robert Wood Johnson Foundation.

<sup>‡</sup> Not all counties have information on all indicators from the County Health Rankings; the denominators may vary.

<sup>§</sup> The status of each indicator is classified as “deprivation” if the indicator’s Z-score of this county is ranked below 1 standard deviation among all counties in the U.S.

<sup>#</sup> Each domain (socioeconomic status and physical environment, respectively) of each county is classified as “deprivation” if one or more indicators of the respective domain is classified as deprivation.

Supplementary Table S2. Bivariate associations of contextual/social determinants with PROs among young survivors of childhood cancer.

| Factors                                     | Depression†           | Psychological stress† | Fatigue†             | Sleep disturbance†   | Positive affect†       | Mobility†               |
|---------------------------------------------|-----------------------|-----------------------|----------------------|----------------------|------------------------|-------------------------|
|                                             | B (95% CI)            | B (95% CI)            | B (95% CI)           | B (95% CI)           | B (95% CI)             | B (95% CI)              |
| Survivor factors (personal level)           |                       |                       |                      |                      |                        |                         |
| Age                                         | 0.14 (-0.22, 0.50)    | 0.54 (0.15, 0.92)**   | 0.06 (-0.40, 0.52)   | 0.36 (-0.02, 0.74)   | -0.49 (-0.83, -0.14)** | -0.04 (-0.34, 0.26)     |
| Time since diagnosis                        | -0.07 (-0.44, 0.29)   | 0.34 (-0.04, 0.73)    | -0.04 (-0.49, 0.42)  | 0.15 (-0.22, 0.53)   | -0.3 (-0.66, 0.05)     | 0.26 (-0.04, 0.56)      |
| Sex                                         |                       |                       |                      |                      |                        |                         |
| Male                                        | Ref                   | Ref                   | Ref                  | Ref                  | Ref                    | Ref                     |
| Female                                      | 3.8 (1.81, 5.85)***   | 4.58 (2.41, 6.75)***  | 2.3 (-0.28, 4.89)    | 1.16 (-1.02, 3.27)   | -0.4 (-0.24, 1.62)     | -0.32 (-2.03, 1.39)     |
| Cancer Diagnosis                            |                       |                       |                      |                      |                        |                         |
| Hematologic cancers                         | Ref                   | Ref                   | Ref                  | Ref                  | Ref                    | Ref                     |
| CNS tumors                                  | 0.21 (-3.08, 3.51)    | 0.17 (-3.35, 3.69)    | 3.64 (-0.44, 7.71)   | -2.11 (-5.50, 1.29)  | 0.56 (-2.64, 3.76)     | -3.98 (-6.64, -1.33)**  |
| Solid tumors                                | -0.85 (-3.09, 1.40)   | -1.52 (-3.94, 0.90)   | -0.95 (-3.75, 1.86)  | -0.46 (-2.34, 1.41)  | -0.46 (-2.34, 1.41)    | -0.46 (-2.34, 1.41)     |
| Caregiver and family factors (family level) |                       |                       |                      |                      |                        |                         |
| Annual household income                     |                       |                       |                      |                      |                        |                         |
| ≥ \$75,000                                  | Ref                   | Ref                   | Ref                  | Ref                  | Ref                    | Ref                     |
| <75,000                                     | 1.35 (-0.74, 3.40)    | -1.13 (-3.39, 1.13)   | 0.63 (-2.01, 3.26)   | 0.37 (-1.81, 2.55)   | -0.98 (-3.03, 1.06)    | -0.32 (-2.05, 1.41)     |
| # of caregiver chronic diseases             | 0.81 (0.02, 1.59)*    | 0.82 (-0.02, 1.67)    | 0.87 (-0.11, 1.85)   | 0.38 (-0.44, 1.19)   | -0.31 (-1.08, 0.45)    | -0.49 (-1.14, 0.15)     |
| Family dynamics                             |                       |                       |                      |                      |                        |                         |
| Cohesion                                    | 0.11 (-0.21, -0.003)* | -0.06 (-0.16, 0.05)   | -0.03 (-0.16, 0.10)  | -0.09 (-0.19, 0.02)  | 0.03 (-0.06, 0.13)     | 0.10 (0.02, 0.18)**     |
| Conflict                                    | 0.10 (-0.01, 0.22)    | 0.11 (-0.01, 0.23)    | 0.09 (-0.06, 0.23)   | 0.21 (0.09, 0.32)**  | -0.12 (-0.23, -0.01)** | -0.09 (-0.18, 0.01)     |
| Expressiveness                              | -0.01 (-0.11, 0.09)   | -0.02 (-0.13, 0.09)   | -0.06 (-0.19, 0.07)  | -0.05 (-0.15, 0.06)  | 0.03 (-0.06, 0.13)     | 0.002 (-0.08, 0.09)     |
| Caregiver PROs                              |                       |                       |                      |                      |                        |                         |
| Anxiety                                     | 0.23 (0.12, 0.34)**   | 0.22 (0.10, 0.34)***  | 0.31 (0.18, 0.46)*** | 0.29 (0.18, 0.41)*** | -0.16 (-0.26, -0.04)** | -0.11 (-0.21, -0.02)*   |
| Fatigue                                     | 0.17 (0.05, 0.29)**   | 0.22 (0.10, 0.35)**   | 0.33 (0.18, 0.47)**  | 0.24 (0.12, 0.36)**  | -0.13 (-0.25, -0.01)*  | -0.15 (-0.24, -0.05)**  |
| Sleep disturbance                           | 0.08 (0.04, 0.31)*    | 0.17 (0.02, -0.31)*   | 0.2 (0.13, 0.46)**   | 0.23 (0.09, 0.36)**  | -0.06 (-0.19, 0.07)    | -0.19 (-0.30, -0.08)*** |

|                                     |                     |                     |                     |                     |                        |                       |
|-------------------------------------|---------------------|---------------------|---------------------|---------------------|------------------------|-----------------------|
| Pain intensity                      | 0.08 (-0.06, 0.21)  | -0.03 (-0.17, 0.11) | 0.13 (-0.03, 0.29)  | 0.09 (-0.05, 0.22)  | -0.01 (-0.14, 0.12)    | -0.05 (-0.16, 0.06)   |
| Physical function                   | -0.05 (-0.22, 0.12) | -0.04 (-0.21, 0.13) | -0.18 (-0.38, 0.02) | -0.07 (-0.24, 0.10) | 0.07 (-0.09, 0.23)     | 0.09 (-0.04, 0.22)    |
| Neighborhood factors (county level) |                     |                     |                     |                     |                        |                       |
| Socioeconomic status                | 1.50 (-0.69, 0.99)  | -0.36 (-1.26, 0.55) | 0.38 (0.67, 1.42)   | 1.14 (0.28, 2.00)** | 0.25 (-0.57, 1.07)     | -0.13 (-0.81, 0.56)   |
| Physical environment                | -0.81 (-2.44, 0.82) | 2.59 (0.85, 4.32)** | 1.75 (-0.29, 3.78)  | 1.74 (0.06, 3.41)*  | -2.14 (-3.71, -0.56)** | -1.43 (-2.76, -0.10)* |

Abbreviation: PROs, patient-reported outcomes; B, regression coefficient; CI, confidence interval; Ref, reference group

\* $P < 0.05$ , \*\* $P < 0.01$ , \*\*\* $P < 0.001$

† Higher score indicates poorer PROs

‡ Higher score indicates better PROs
